# Supplementary material for: Molecular Phylogenetic Analysis of Paracoccidioides Species Complex Present in Paracoccidioidomycosis Patient Tissue Samples
Source: MDPI journal article supplement (doi:10.3390/microorganisms11030562), 2023-02-23
Supplement: s1 [file s1]

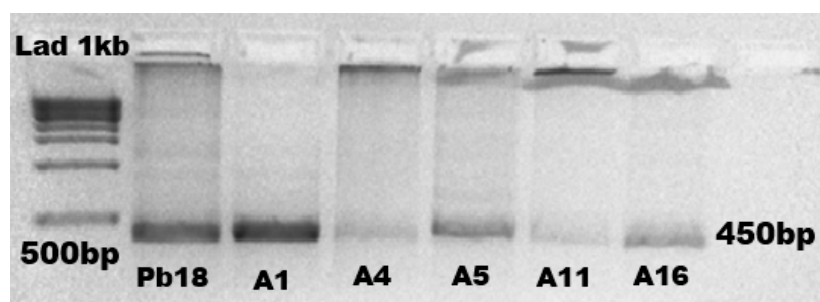

**Figure S1.** Amplification of the ITS gene (450 base pairs) in 2% agarose gel photographed using GE Image Quant LAS 4000 (GE Healthcare, Little Chalfont, United Kingdom).

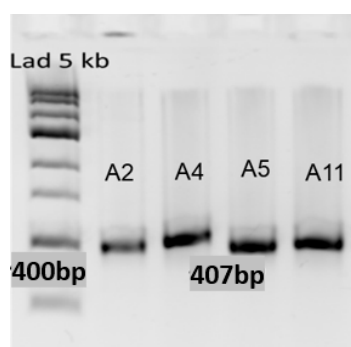

**Figure S2.** Amplification of the ARF gene (407 base pairs) in 2% agarose gel photographed using GE Image Quant LAS 4000 (GE Healthcare, Little Chalfont, United Kingdom).

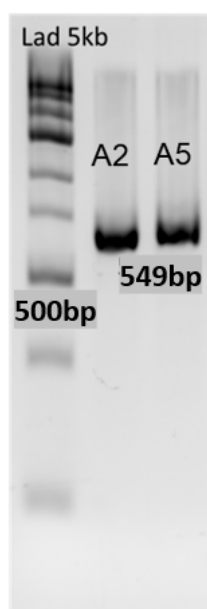

**Figure S3.** Amplification of the CHS2 gene (549 base pairs) in 2% agarose gel photographed using GE Image Quant LAS 4000 (GE Healthcare, Little Chalfont, United Kingdom).

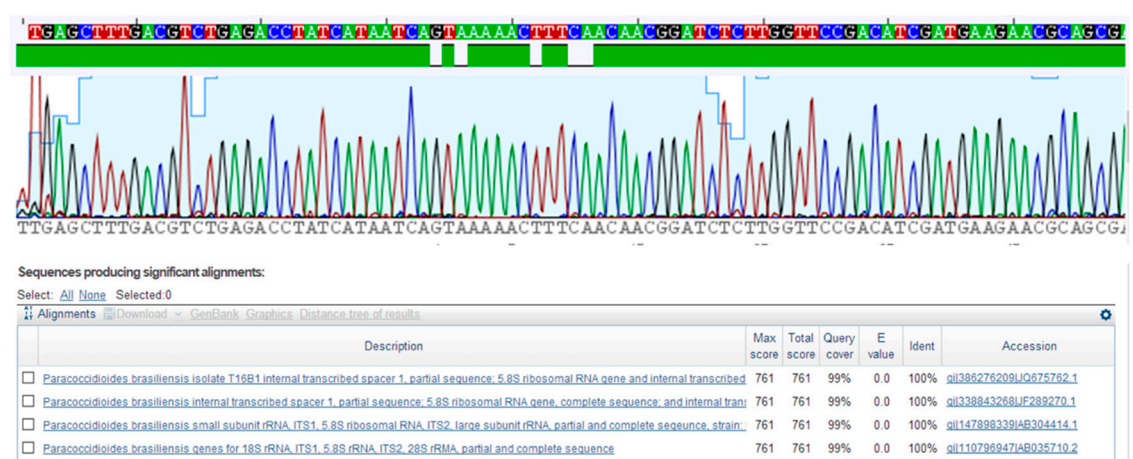

**Figure S4.** Sequence and blast of the ITS *loci* using the online tool Nucleotide Blast available at <https://blast.ncbi.nlm.nih.gov>.

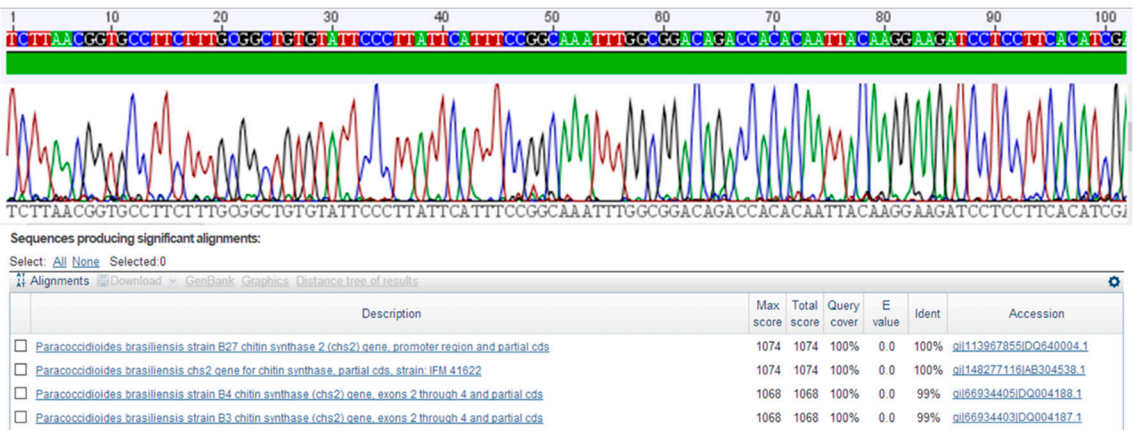

**Figure S5.** Sequence and blast of the CHS2 gene using the online tool Nucleotide Blast available at <https://blast.ncbi.nlm.nih.gov>.

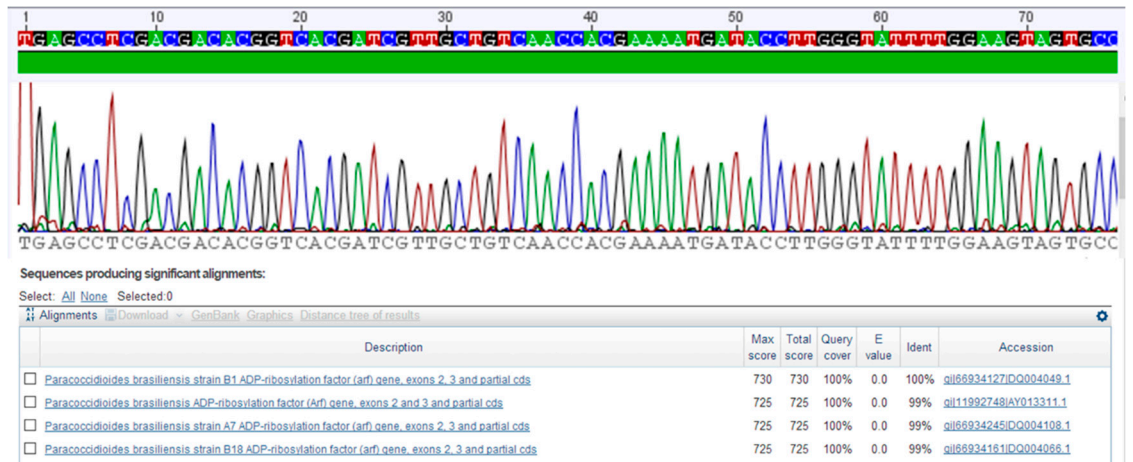

**Figure S6.** Sequence and blast of the ARF gene using the online tool Nucleotide Blast available at <https://blast.ncbi.nlm.nih>.

**Table S1.** The GenBank accession numbers for the sequences used to construct our phylogenetic trees.

| <b>Sample Identifier</b> | <b>GenBank Accession Number (ITS)</b> | <b>GenBank Accession Number (CHS2 gene)</b> | <b>GenBank Accession Number (ARF gene)</b> |
|--------------------------|---------------------------------------|---------------------------------------------|--------------------------------------------|
| FT1                      | OQ363050                              | OQ398644                                    | OQ398607                                   |
| FT2                      | OQ363108                              | OQ398645                                    | OQ398608                                   |
| FT3                      | OQ363109                              | OQ398646                                    | OQ398609                                   |
| FT4                      | OQ363110                              | OQ398647                                    | OQ398610                                   |
| FT5                      | OQ363111                              | OQ398648                                    | OQ398611                                   |
| FFPE_2                   | OQ363113                              | OQ398649                                    | OQ398612                                   |
| FFPE_3                   | OQ372105                              | OQ398650                                    | OQ398613                                   |
| FFPE_4                   | OQ363116                              | OQ398651                                    | OQ398614                                   |
| FFPE_5                   | OQ372091                              | OQ398652                                    | OQ398615                                   |
| FFPE_6                   | OQ363135                              | OQ398653                                    | OQ398616                                   |
| FFPE_9                   | OQ372094                              | OQ398654                                    | OQ398617                                   |
| FFPE_11                  | OQ372082                              | OQ398655                                    | OQ398618                                   |
| FFPE_14                  | OQ372090                              | OQ398656                                    | OQ398619                                   |
| FFPE_15                  | OQ372088                              | OQ398657                                    | OQ398620                                   |
| FFPE_16                  | OQ372085                              | OQ398658                                    | OQ398621                                   |
| FFPE_17                  | OQ372084                              | OQ398659                                    | OQ398622                                   |
| FFPE_18                  | OQ372093                              | OQ398660                                    | OQ398623                                   |
| FFPE_19                  | OQ372100                              | OQ398661                                    | OQ398624                                   |
| FFPE_20                  | OQ372092                              | OQ398662                                    | OQ398625                                   |
| FFPE_21                  | OQ372087                              | OQ398663                                    | OQ398626                                   |
| FFPE_22                  | OQ372102                              | OQ398664                                    | OQ398627                                   |
| FFPE_24                  | OQ363174                              | OQ398665                                    | OQ398628                                   |
| FFPE_25                  | OQ372097                              | OQ398666                                    | OQ398629                                   |
| FFPE_26                  | OQ372089                              | OQ398667                                    | OQ398630                                   |
| FFPE_27                  | OQ372083                              | OQ398668                                    | OQ398631                                   |
| FFPE_28                  | OQ372098                              | OQ398669                                    | OQ398632                                   |
| FFPE_29                  | OQ372086                              | OQ398670                                    | OQ398633                                   |
| FFPE_30                  | OQ372101                              | OQ398671                                    | OQ398634                                   |
| FFPE_31                  | OQ372107                              | OQ398672                                    | OQ398635                                   |
| FFPE_32                  | OQ372096                              | OQ398678                                    | OQ398636                                   |
| FFPE_33                  | OQ372108                              | OQ398674                                    | OQ398637                                   |
| FFPE_34                  | OQ372106                              | OQ398676                                    | OQ398638                                   |
| FFPE_35                  | OQ372103                              | OQ398677                                    | OQ398639                                   |
| FFPE_37                  | OQ372104                              | OQ398678                                    | OQ398640                                   |
| FFPE_38                  | OQ372109                              | OQ398679                                    | OQ398641                                   |
| FFPE_40                  | OQ372095                              | OQ398680                                    | OQ398642                                   |
| FFPE_42                  | OQ372099                              | OQ398675                                    | OQ398643                                   |

**Table S2.** The GenBank accession numbers for the sequences used to compare with our isolates and construct the ARF and CHS2 phylogenetic tree.

| <b>Sample Identifier</b> | <b>GenBank Accession Number (CHS2 gene)</b> | <b>GenBank Accession Number (ARF gene)</b> |
|--------------------------|---------------------------------------------|--------------------------------------------|
| B10 (S1 species)         | DQ004193.1                                  | DQ004058.1                                 |
| B16(S1 species)          | DQ004243.1                                  | DQ004064.1                                 |
| B7 (PS2 species)         | DQ004179.1                                  | DQ004055.1                                 |
| B13 (PS2 species)        | DQ004181.1                                  | DQ004061.1                                 |
| B26 (PS2 species)        | DQ004183.1                                  | DQ004113.1                                 |
| C1 (PS3 species)         | DQ004205.1                                  | DQ004074.1                                 |
| C10 (PS3 species)        | DQ004214.1                                  | DQ004083.1                                 |
| C17 (PS3 species)        | DQ004221.1                                  | DQ004090.1                                 |
| 218 ( <i>P. lutzii</i> ) | EU870232.1                                  | EU870333.1                                 |
| 717 ( <i>P. lutzii</i> ) | EU870230.1                                  | EU870320.1                                 |
| 769 ( <i>P. lutzii</i> ) | EU870231.1                                  | EU870332.1                                 |
